# Supplementary material
Source: publisher site journal article supplement (https://www.spandidos-publications.com/1072/downloadSupplementary)

Figure S1. miR-1297 regulates the cell cycle of MDA-MB-231 cells. Effect of miR-1297 on cell cycle distribution in MDA-MB-231 cells (distribution in G<sub>0</sub>/G<sub>1</sub>: miR-1297, 40.80%; NC, 42.52%). Data are presented as the mean + SD. Unpaired Student's t-test. miR, microRNA; NC, negative control.

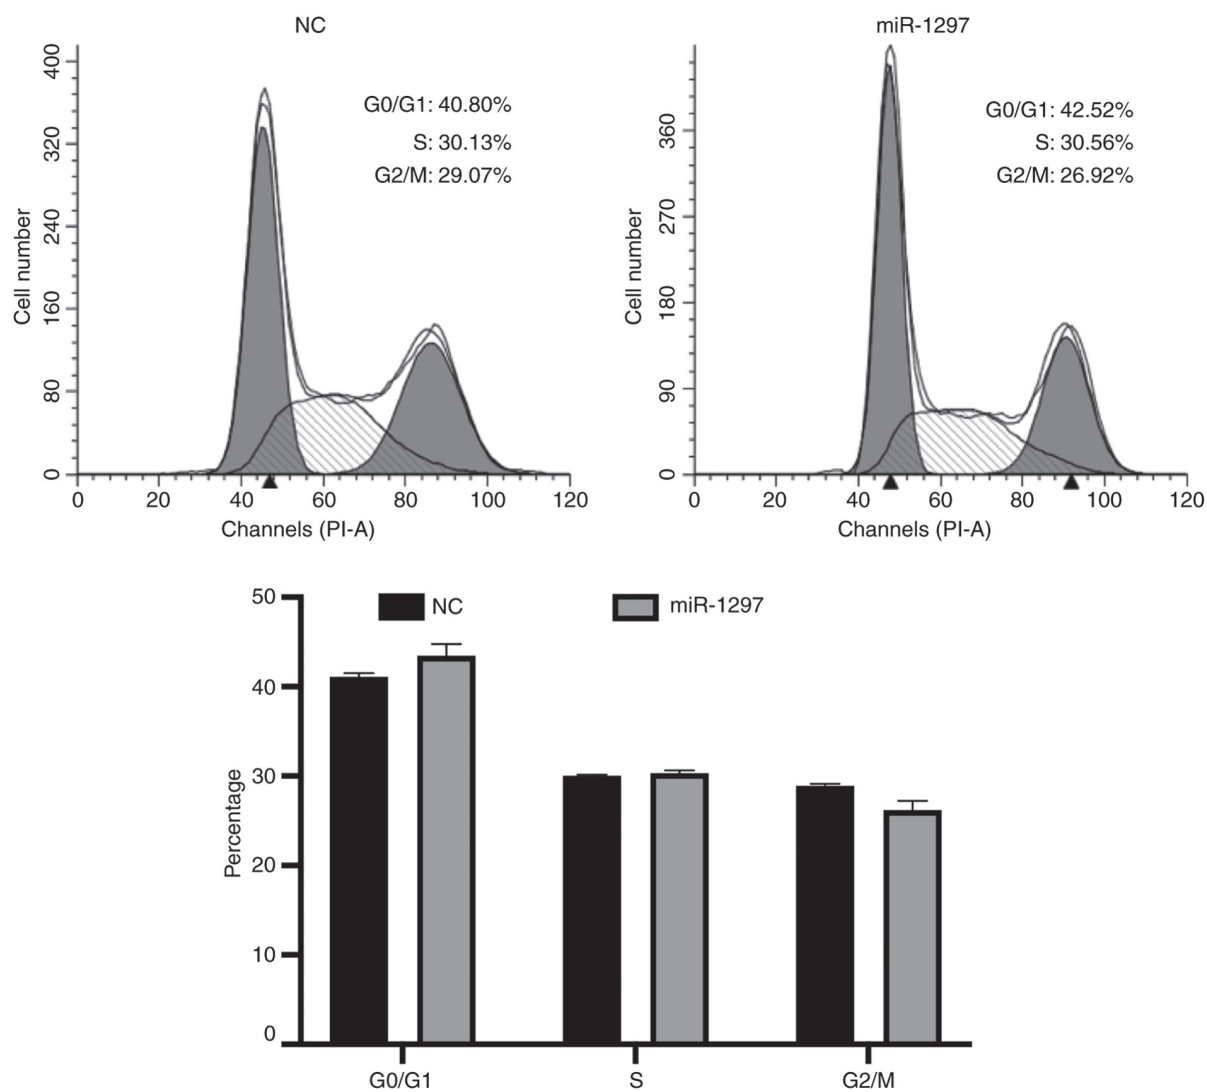

Supplement: Supplementary file 1 [file downloadSupplementary]
